# Supplementary material for: Organic Acid Accumulation and Associated Dynamic Changes in Enzyme Activity and Gene Expression during Fruit Development and Ripening of Common Loquat and Its Interspecific Hybrid
Source: MDPI journal article supplement (doi:10.3390/foods12050911), 2023-02-21
Supplement: s1 [file s1]

**Table S1. Primers used for quantitative real-time polymerase chain reaction in this study**

| Gene                                 | Primer F                | Primer R                   | Gene ID in loquat genome or reference |
|--------------------------------------|-------------------------|----------------------------|---------------------------------------|
| <i>Actin</i>                         | AATGGAACTGGAATGGTCAAGGC | TGCCAGATCTTCTCCATGTCATCCCA |                                       |
| <i>PEPC2</i>                         | GTGGTTCTTGGAATGTAA      | GAAGTGTCTAGCAATCC          |                                       |
| <i>NAD-MDH</i>                       | CTGGTGTCTTCTATGATA      | TCTCTTCTGGATAAGTTC         |                                       |
| <i>NADP-ME2</i>                      | GAATACCATCCGACAATA      | ACATTATCAACGAGAAGT         | -                                     |
| <i>VHA-A</i>                         | TGAAGGAGGTGATAGACA      | ACTGCGGACATTATTATACT       |                                       |
| <i>VHP1</i>                          | CATCTTCGTTGGTGTATT      | TTGCCTGTGTTATATGTG         |                                       |
| <i>PEPC</i>                          | GTGATGTTCCCAAGACTGAA    | TCTCAAACAATGGAACAACC       | <i>Ej00033952</i>                     |
| <i>NADP-ME</i>                       | GAGTGTCTCGGTTGCTAGTG    | ACTTCTGCAGTGGAACCTGA       | <i>Ej00091189</i>                     |
| <i>NADP-ME4</i>                      | ACACCACAACAAAGGTCTTG    | ACTTCTGCAGTGGAACCTGA       | <i>Ej00076553</i>                     |
| <i>CS</i>                            | TTCCAGAATGCCAGAAAGTA    | ACTACAGCACGAGTCCTCAA       | <i>Ej00032441</i>                     |
| <i>ATP-CS <math>\alpha</math>1</i>   | GTGAAGCCTGACATGTTGTT    | AACTCTTCATTGTGGGGAAT       | <i>Ej00011370</i>                     |
| <i>ATP-CS <math>\alpha</math>2-1</i> | GTGAGCTTTTCAGAGTGTGG    | CTGGAATACAGCAAATACGC       | <i>Ej00094058</i>                     |
| <i>ATP-CS <math>\beta</math>2</i>    | TGGAAGCTGCTATCAAGGAA    | GTTCCCTCACCTCTGTCATCA      | <i>Ej00074816</i>                     |
| <i>ACO</i>                           | ATATCTTGGACGGGTTGTTT    | TTCAGCTTCAATACCTCCAA       | <i>Ej00088565</i>                     |
| <i>NAD-IDH1</i>                      | AACATTATGAAGCTGGCTGA    | AACGAGTTGCATACAGCAAT       | <i>Ej00095950</i>                     |
| <i>NAD-IDH5</i>                      | AGTGGTGAGAGGTGTTGTTG    | GCTTTGTGAATTGCAGAGAC       | <i>Ej00051965</i>                     |
| <i>tDT2</i>                          | GAAGTTGATGGACTGGAACA    | GGGCTTTCGATAAAATGTCT       | <i>Ej00066741</i>                     |
| <i>VHA-A3</i>                        | TGTTTGTACTTGCGACCTT     | AACGGGACAGAGAAGAACTC       | <i>Ej00009754</i>                     |
| <i>VHA-B2-1</i>                      | GACAACTTTGCCATTGTGTT    | TCAATTGTAGGGTCATTTGC       | <i>Ej00095876</i>                     |
| <i>VHA-B2-2</i>                      | AAAATCCCACTTTTCTCTGC    | AATCCCGTTTAAAGAACTGC       | <i>Ej00010503</i>                     |
| <i>VHA-C</i>                         | AGAACAAGTGCTCGTGAAAA    | AAACCTCCCCATAACTGGTA       | <i>Ej00016657</i>                     |
| <i>VHA-D2</i>                        | CGACAAGGCATTTTATGAAG    | AGATTCCTGATCTCCTGCTC       | <i>Ej00017543</i>                     |
| <i>VHA-E1</i>                        | TCTGCTGAGGAAGAATTCAA    | TTCATGGAGTTAACCACGTC       | <i>Ej00045917</i>                     |
| <i>VHA-F</i>                         | TTTACAGCAAAGGACGACAT    | GATGCCACAGATTCAAGTGT       | <i>Ej00074402</i>                     |
| <i>ALMT1</i>                         | TGATGCAGTCGATCGAAGAG    | TGGTCCAACTTGGAAGGAG        | <i>EVM0037970.1</i>                   |
| <i>ALMT2</i>                         | AAAGGGTAGGATGCGAAGGT    | AATCTCCCAGCTTTCCGAAT       | <i>EVM0000569.1</i>                   |
| <i>ALMT3</i>                         | GCGGTGATAACCGTGGTAGT    | AAAGATCCCAAGCACAAATGG      | <i>EVM0022757.1</i>                   |
| <i>ALMT4</i>                         | GTGGGAGCCTAGACATGGAA    | TTTGTGCTTTGGATGGTCA        | <i>EVM0025487.1</i>                   |

|               |                      |                       |                     |
|---------------|----------------------|-----------------------|---------------------|
| <i>ALMT5</i>  | CTAGCATCCCTGGCACATTT | CGAATTCTCACTTCCGGGTA  | <i>EVM0013481.1</i> |
| <i>ALMT6</i>  | GCCGCAGAACTGGTAAGAAG | GGTGACATCGGAGAAGGTGT  | <i>EVM0010307.1</i> |
| <i>ALMT7</i>  | GACTTGGGCTTCAACAGCTC | TTTTCGAGGATCCGAATGAC  | <i>EVM0008191.1</i> |
| <i>ALMT8</i>  | GGAGCTCCAGAGAGTTGGTG | TTCCCTGGGACGTACTTCAG  | <i>EVM0037785.1</i> |
| <i>ALMT9</i>  | AGTACGGCTTTCGGGTTTTT | CAGATCCTCTCCCGACCATA  | <i>EVM0008737.1</i> |
| <i>ALMT10</i> | TGGGAAAGCATTGAAGGAAC | GTGTGCCAGGGATGCTAGTT  | <i>EVM0028408.1</i> |
| <i>ALMT11</i> | GGAAGGTTTTGGGGATGAAT | GGTGAGGTTTCCGATCTTGA  | <i>EVM0021601.1</i> |
| <i>ALMT12</i> | TGTGATAGTGCCCGAATTGA | CCAGCAAGCTTTCCAAGTTC  | <i>EVM0017728.1</i> |
| <i>ALMT13</i> | AACTATTCCGGCAGATGTGG | ACTAGGGCAACTCCCACCTT  | <i>EVM0022795.1</i> |
| <i>ALMT14</i> | GAAGTTCTTGAGGCCACAGC | CAATCCTCCCCAACTCTTCA  | <i>EVM0016148.1</i> |
| <i>ALMT15</i> | GGTGCCATGATCTTCATCCT | TGAAATAATCCGCCACACAA  | <i>EVM0012726.1</i> |
| <i>ALMT16</i> | TATTGAACGCGGATGATGAA | AAACACCTGTGGGCAAGTTC  | <i>EVM0012851.1</i> |
| <i>ALMT17</i> | CGATGGTATTGGTGTTCAG  | AAAGATCCCAAGCACAAATGG | <i>EVM0040195.1</i> |

**Table S2.** Authentic standard organic acid compounds used in the HPLC analysis and equations of standard curves.

| Compound name       | Elute time (min) | Linear equation  | Correlation coefficient (R <sup>2</sup> ) |
|---------------------|------------------|------------------|-------------------------------------------|
| oxalic acid         | 2.84             | y=14.191x-24.94  | 0.9995                                    |
| tartaric acid       | 3.34             | y=2.1536x+10.266 | 0.9999                                    |
| malic acid          | 4.14             | y=1.7876x+0.1158 | 1.0000                                    |
| α-ketoglutaric acid | 5.39             | y=8.5712x-27.732 | 1.0000                                    |
| citric acid         | 8.25             | y=1.0832x-2.0558 | 1.0000                                    |
| succinic acid       | 9.30             | y=0.6751x-13.784 | 0.9996                                    |

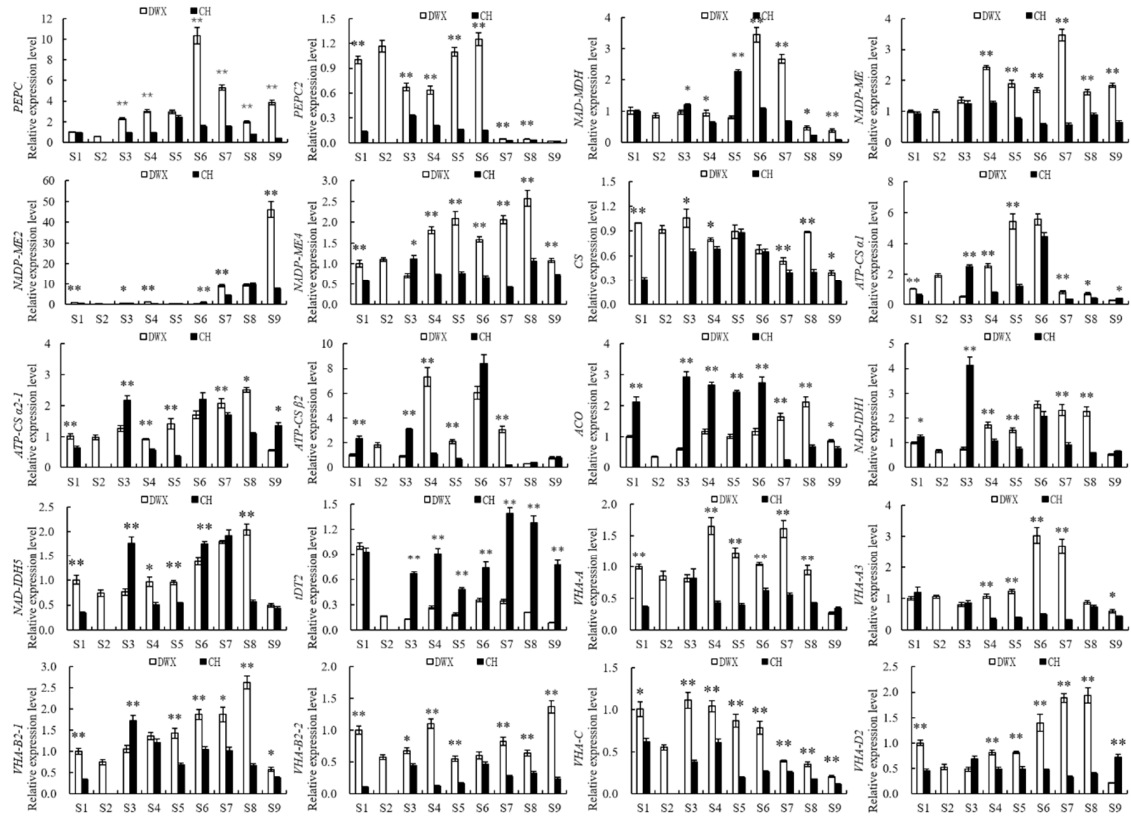

**Figure S1.** Dynamic changes in expressions of forty genes related to organic acid metabolism during different stages of fruit development and ripening in Dawuxing and its interspecific hybrid. The stages numbered on the x-axis correspond to those presented in Figure 1. Values are means  $\pm$  SD of three biological replicates. The asterisks indicate significant differences (\*:  $p \leq 0.05$ ; \*\*:  $p \leq 0.01$ ).

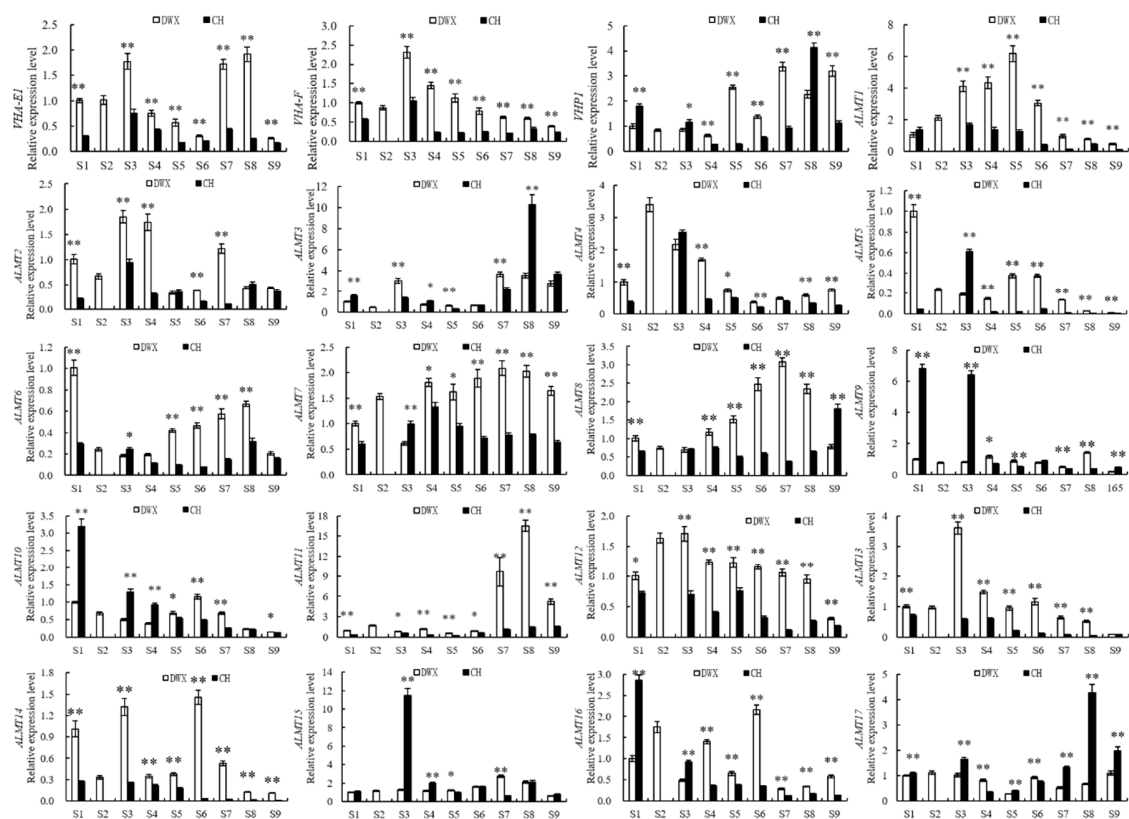

Figure S2: Figure S1 continued.
